# Supplementary material for: Three-Dimensional Gradients of Cytokine Signaling between T Cells
Source: PubMed Central journal article supplement (PMC4414419; doi:10.1371/journal.pcbi.1004206), 2015-04-29
Supplement: pcbi.1004206.s002.pdf [file pcbi.1004206.s002.pdf]

1h

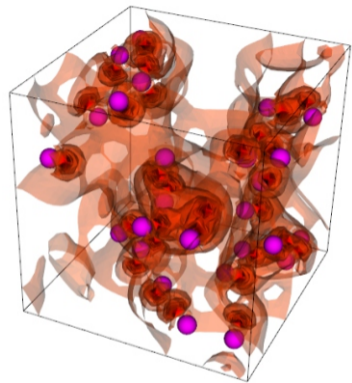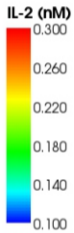

9h

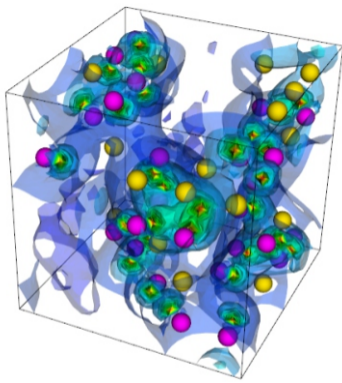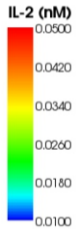

30h

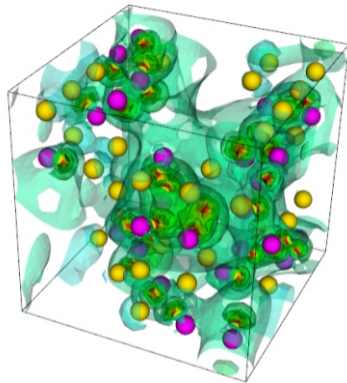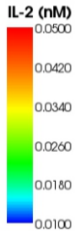

Thurley et al. Figure S1
