# Supplementary material for: Three-Dimensional Gradients of Cytokine Signaling between T Cells
Source: PubMed Central journal article supplement (PMC4414419; doi:10.1371/journal.pcbi.1004206), 2015-04-29
Supplement: pcbi.1004206.s003.pdf [file pcbi.1004206.s003.pdf]

**A**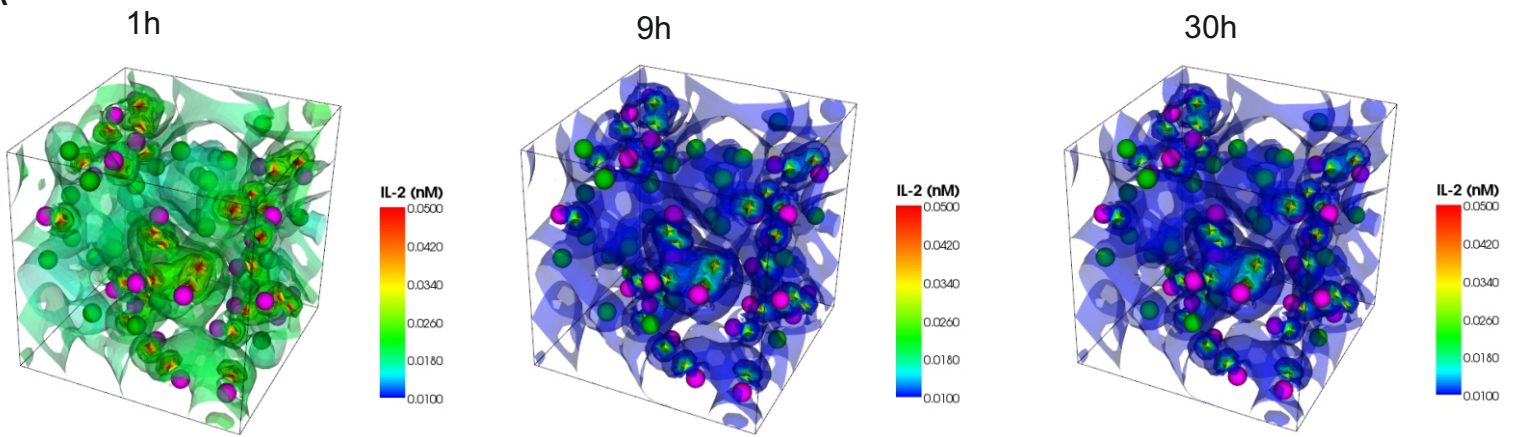**B**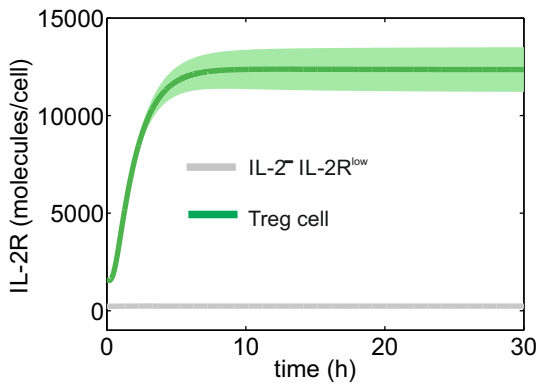**C**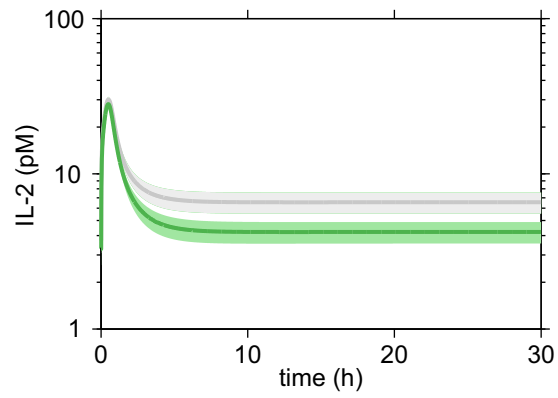

Thurley et al. Figure S2
